# Supplementary material for: Cytotoxic Xanthones from Hypericum stellatum, an Ethnomedicine in Southwest China
Source: MDPI journal article supplement (doi:10.3390/molecules24193568), 2019-10-02
Supplement: s1 [file s1]

Supplementary Materials

# Cytotoxic xanthones from *Hypericum stellatum*, an ethnomedicine in southwest China

Yuanyuan Ji <sup>1,2</sup>, Ruifei Zhang <sup>1,2</sup>, Chen Zhang <sup>1</sup>, Xingyu Li <sup>3</sup>, Chaonan Yuan <sup>1</sup>, Edward J. Kennelly <sup>4,5</sup>, and Chunlin Long <sup>1,2,\*</sup>

<sup>1</sup> College of Life and Environmental Sciences, Minzu University of China, Beijing 100081, China

<sup>2</sup> Key Laboratory of Ethnomedicine, Minzu University of China, Ministry of Education, Beijing 100081, China

<sup>3</sup> College of Science, Yunnan Agriculture University, Kunming 650201, China

<sup>4</sup> Department of Biological Sciences, Lehman College, City University of New York, Bronx, NY 10468, USA

<sup>5</sup> The Graduate Center, City University of New York, New York, NY 10016, USA

\* Correspondence: long@mail.kib.ac.cn; Tel.: +86-010-68930381

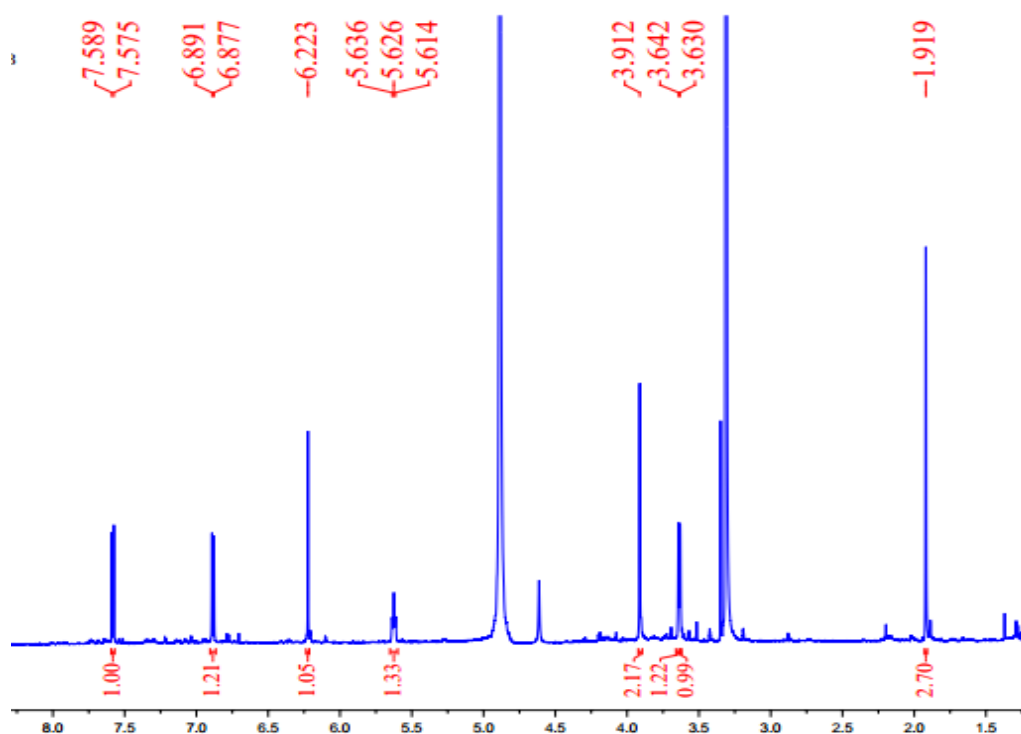

**Figure S1.** <sup>1</sup>H-NMR spectrum of hypxanthone A in methanol-*d*<sub>4</sub> (600 MHz).

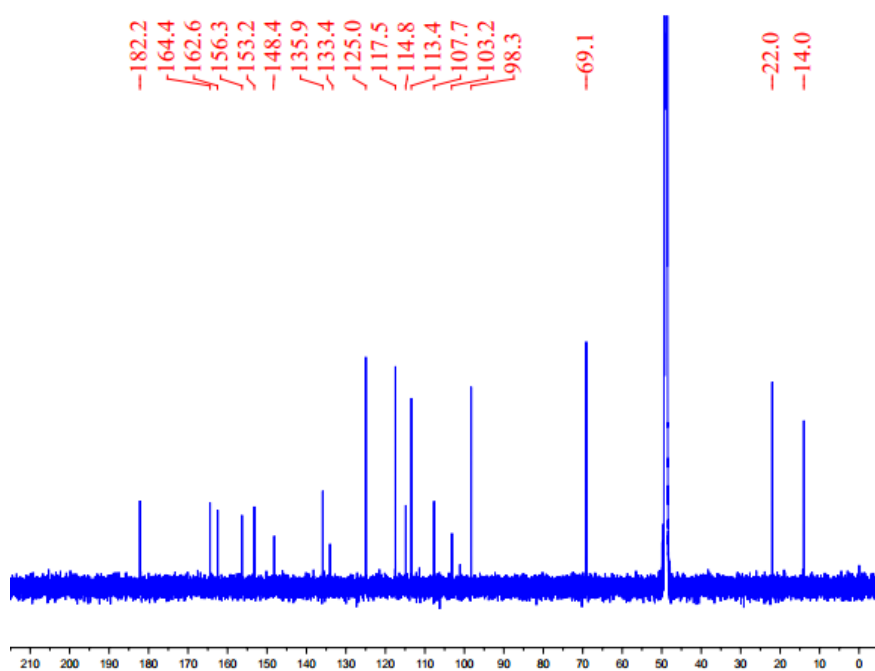

Figure S2.  $^{13}\text{C}$ -NMR spectrum of hypxanthone A in methanol- $d_4$  (151 MHz).

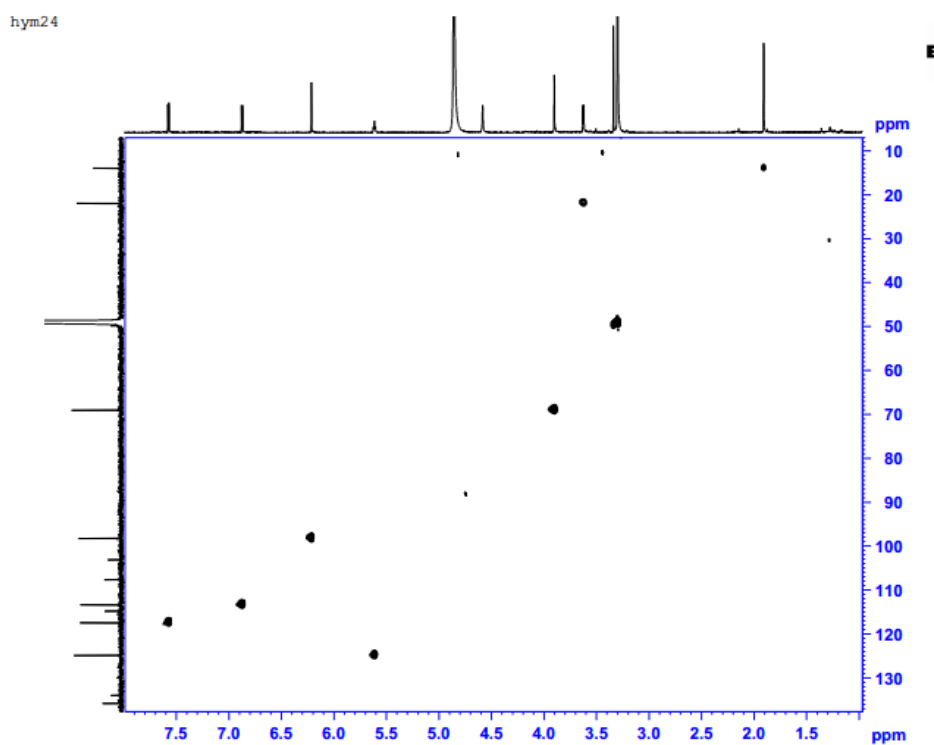

Figure S3. HSQC spectrum of hypxanthone A.

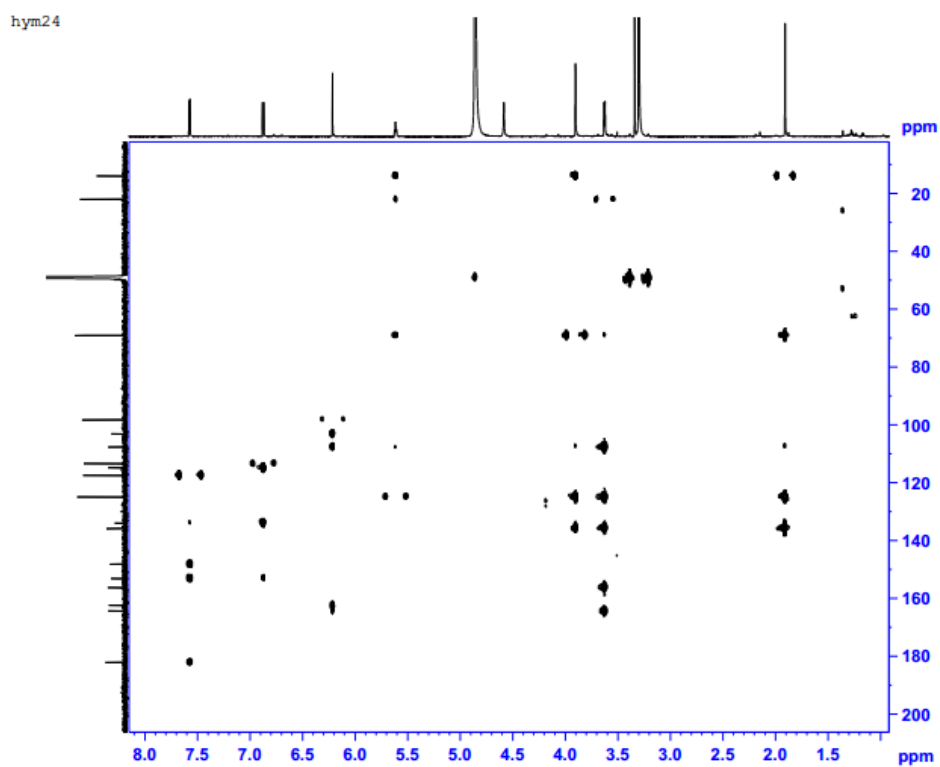

Figure S4. HMBC spectrum of hypxanthone A.

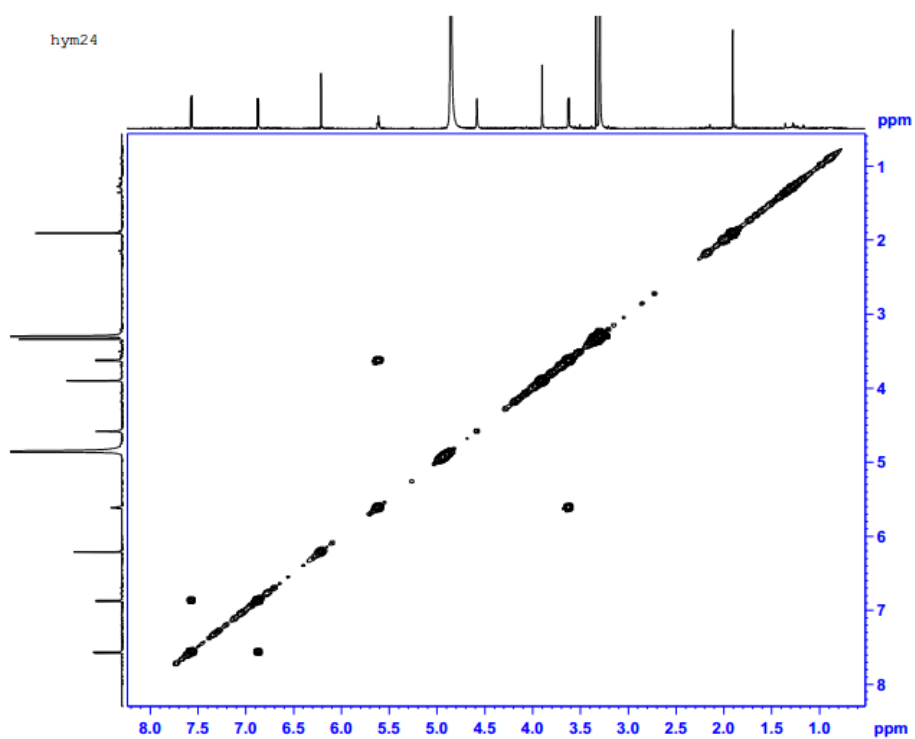

Figure S5.  $^1\text{H}$ - $^1\text{H}$  COSY spectrum of hypxanthone A.

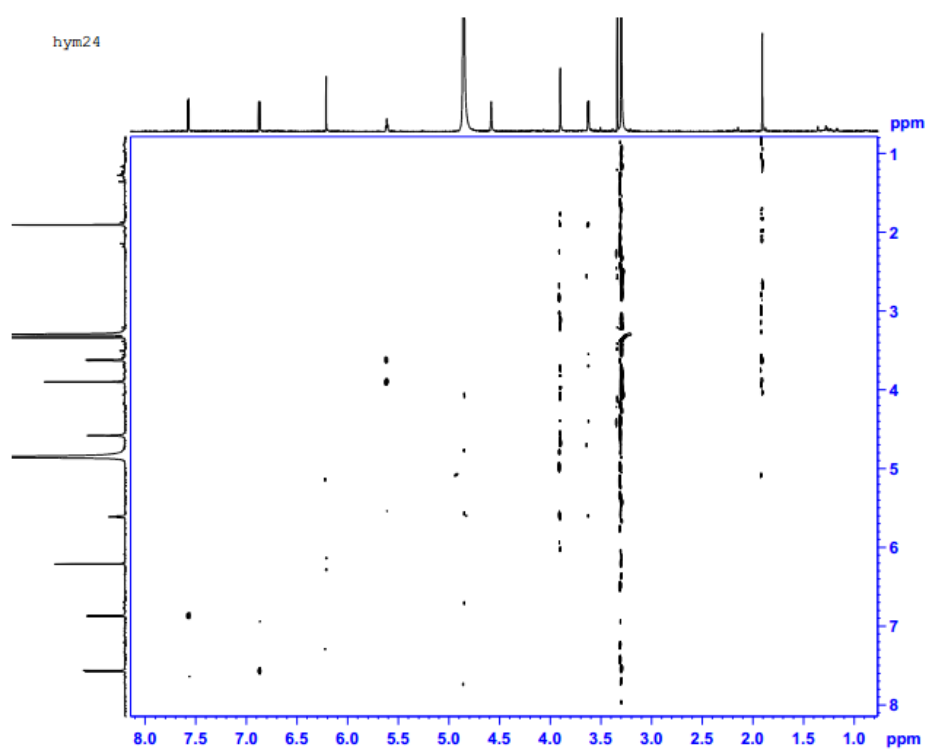

Figure S6. ROESY spectrum of hypxanthone A.

Formula Predictor Report - Hym24.lcd

Page 1 of 1

Data File: E:\DATA\2018\0305\Hym24.lcd

| Elmt | Val. | Min | Max | Elmt | Val. | Min | Max | Elmt | Val. | Min | Max | Elmt | Val. | Min | Max | Use Adduct |
|------|------|-----|-----|------|------|-----|-----|------|------|-----|-----|------|------|-----|-----|------------|
| H    | 1    | 10  | 100 | O    | 2    | 0   | 50  | Si   | 4    | 0   | 0   | Br   | 1    | 0   | 0   | H          |
| C    | 4    | 10  | 50  | F    | 1    | 0   | 0   | S    | 2    | 0   | 0   | I    | 3    | 0   | 0   |            |
| N    | 3    | 0   | 0   | Na   | 1    | 0   | 0   | Cl   | 1    | 0   | 0   |      |      |     |     |            |

Error Margin (ppm): 5

HC Ratio: unlimited

Max Isotopes: all

MSn Iso RI (%): 75.00

DBE Range: -2.0 - 100.0

Apply N Rule: yes

Isotope RI (%): 1.00

MSn Logic Mode: AND

Electron Ions: both

Use MSn Info: yes

Isotope Res: 10000

Max Results: 10

Event#: 2 MS(E-) Ret. Time : 0.320 -&gt; 0.587 Scan#: 50 -&gt; 90

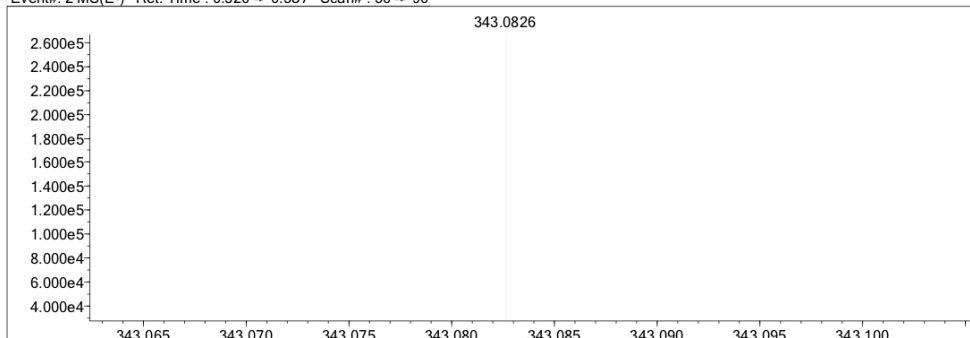

Measured region for 343.0826 m/z

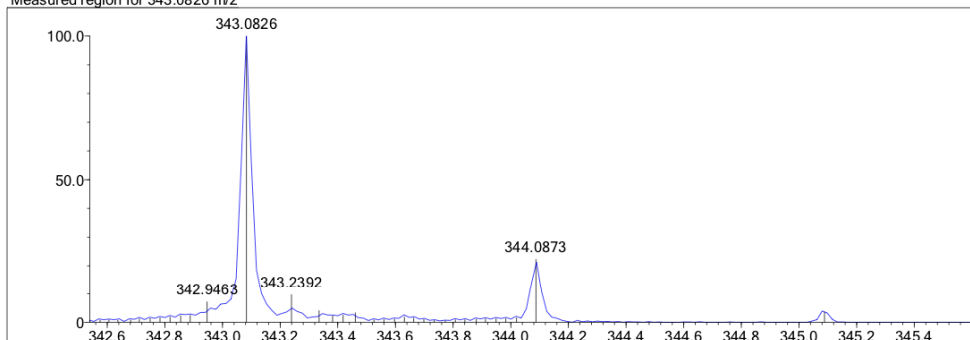

C18 H16 O7 [M-H]- : Predicted region for 343.0823 m/z

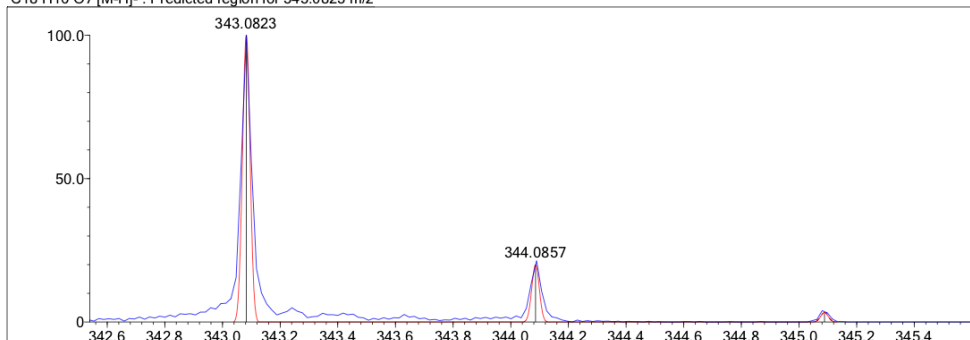

| Formula (M) | Ion    | Meas. m/z | Pred. m/z | Df. (mDa) | Df. (ppm) | DBE  |
|-------------|--------|-----------|-----------|-----------|-----------|------|
| C18 H16 O7  | [M-H]- | 343.0826  | 343.0823  | 0.3       | 0.87      | 11.0 |

Figure S7. HR-ESI-MS spectrum of hypxanthone A.

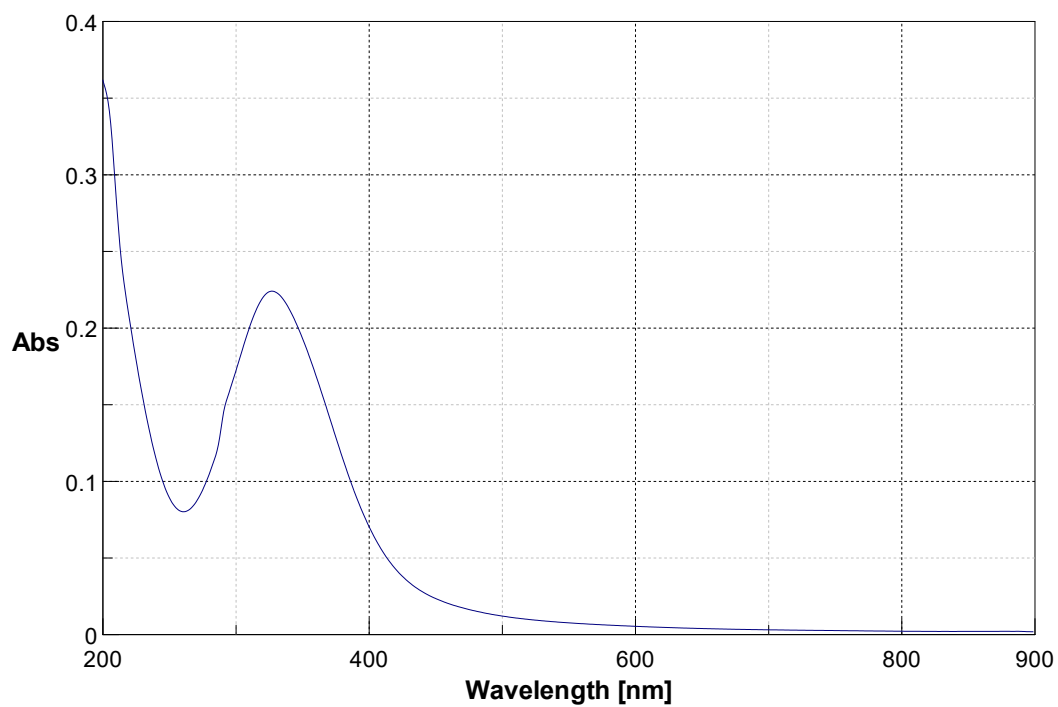

Figure S8. The UV spectrum of hypxanthone A.

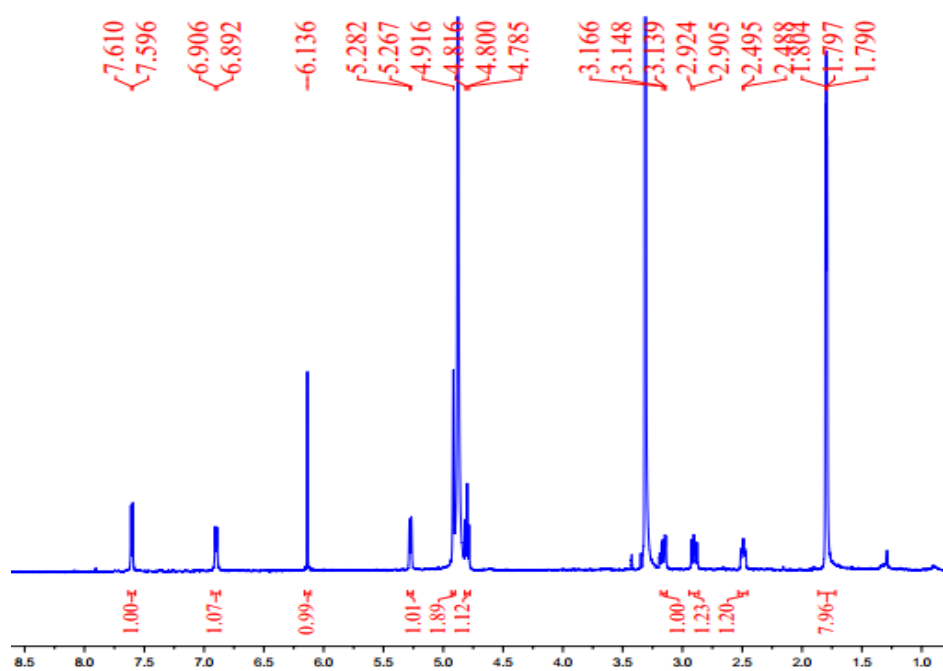

Figure S9. <sup>1</sup>H-NMR spectrum of hypxanthone B in methanol-*d*<sub>4</sub> (600 MHz).

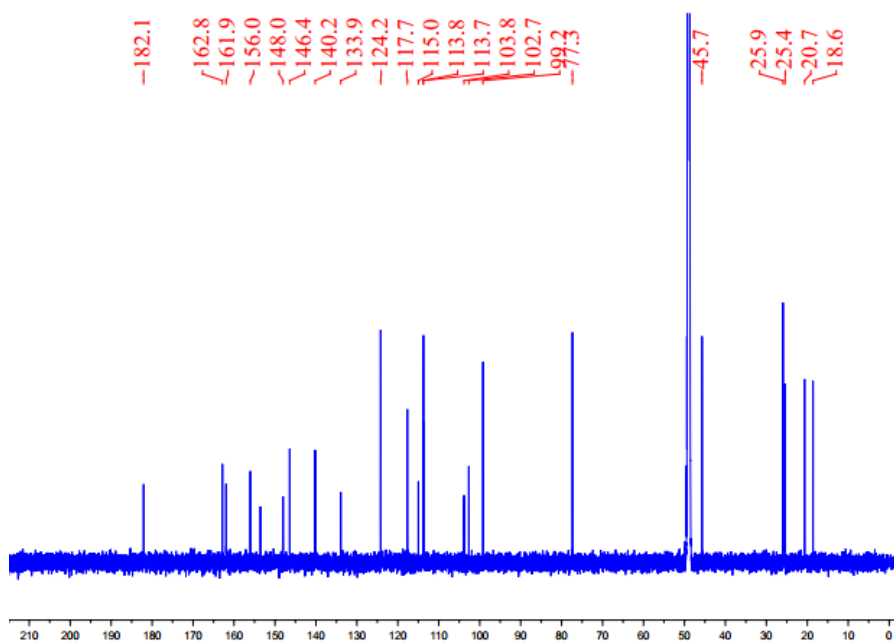

**Figure S10.** <sup>13</sup>C-NMR spectrum of hypxanthone B in methanol-*d*<sub>4</sub> (151 MHz).

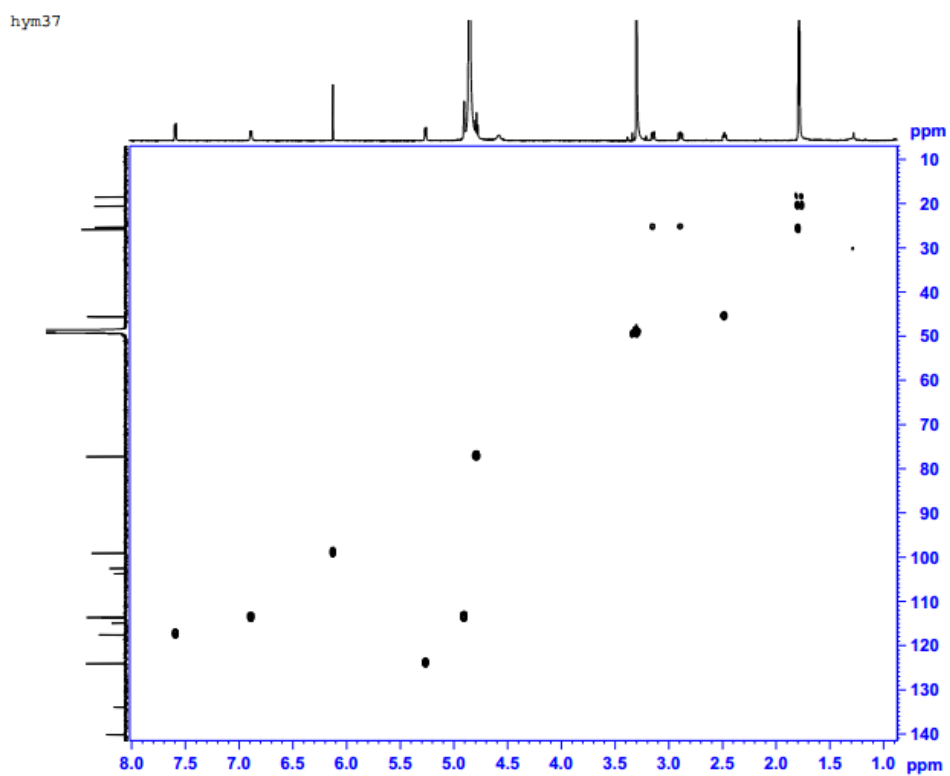

**Figure S11.** HSQC spectrum of hypxanthone B.

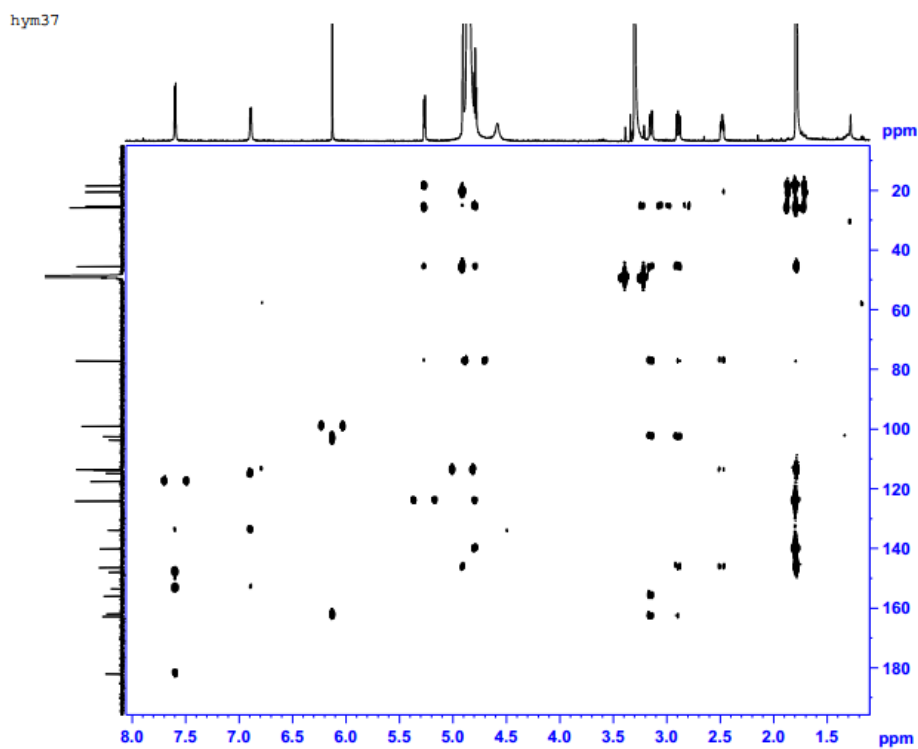

Figure S12. HMBC spectrum of hypxanthone B.

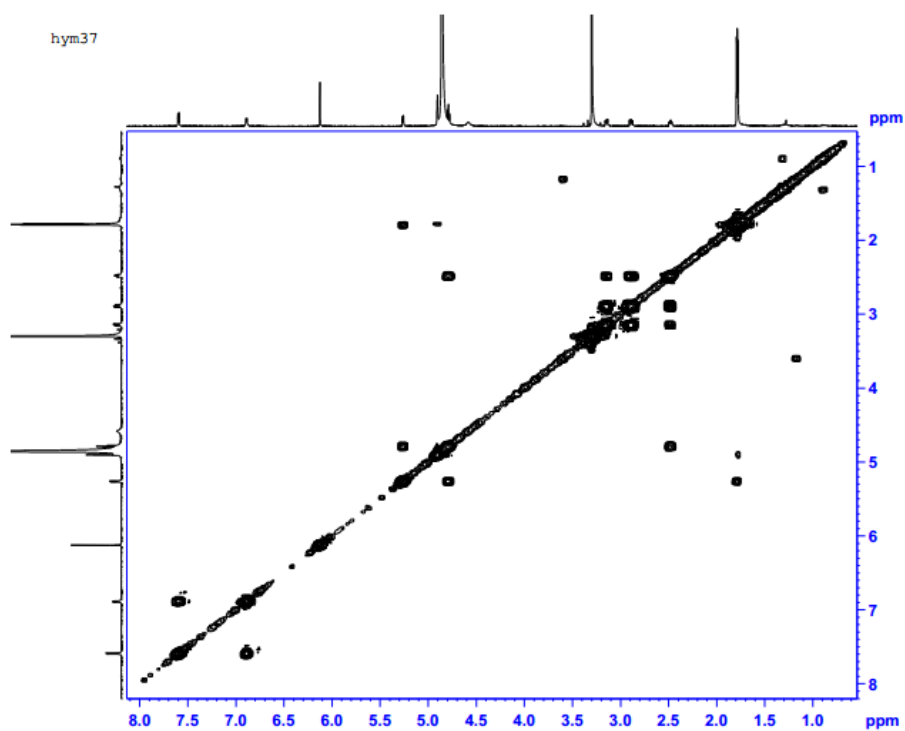Figure S13.  $^1\text{H}$ - $^1\text{H}$  COSY spectrum of hypxanthone B.



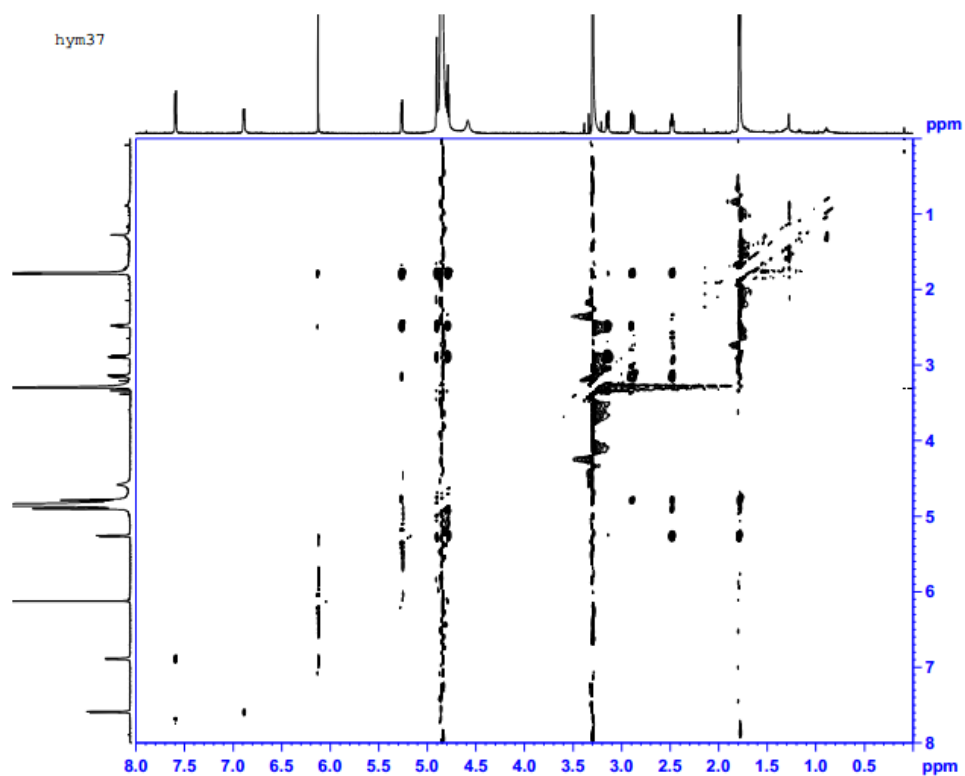

**Figure S14.** ROESY spectrum of hypoxanthone B.

Formula Predictor Report - Hym37.lcd

Page 1 of 1

Data File: E:\DATA\2018\0305\Hym37.lcd

| Elmt | Val. | Min | Max | Elmt | Val. | Min | Max | Elmt | Val. | Min | Max | Elmt | Val. | Min | Max | Use Adduct |
|------|------|-----|-----|------|------|-----|-----|------|------|-----|-----|------|------|-----|-----|------------|
| H    | 1    | 10  | 100 | O    | 2    | 0   | 50  | Si   | 4    | 0   | 0   | Br   | 1    | 0   | 0   | H          |
| C    | 4    | 10  | 50  | F    | 1    | 0   | 0   | S    | 2    | 0   | 0   | I    | 3    | 0   | 0   |            |
| N    | 3    | 0   | 0   | Na   | 1    | 0   | 0   | Cl   | 1    | 0   | 0   |      |      |     |     |            |

Error Margin (ppm): 10

HC Ratio: unlimited

Max Isotopes: all

MSn Iso RI (%): 75.00

DBE Range: -2.0 - 100.0

Apply N Rule: yes

Isotope RI (%): 1.00

MSn Logic Mode: AND

Electron Ions: both

Use MSn Info: yes

Isotope Res: 10000

Max Results: 10

Event#: 2 MS(E-) Ret. Time : 0.320 Scan#: 50

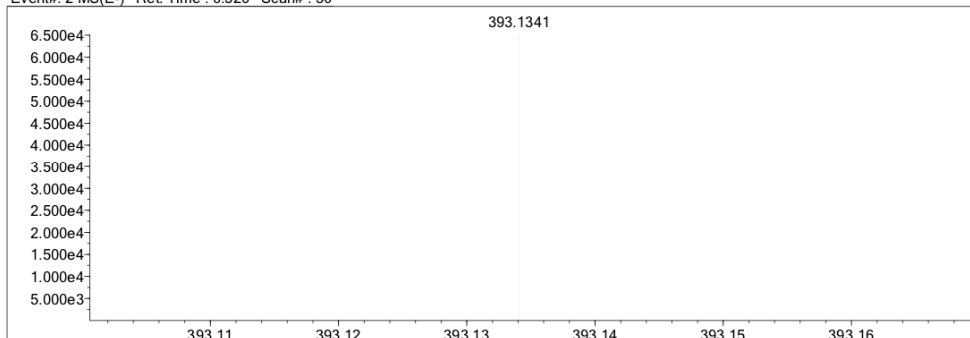

Measured region for 393.1341 m/z

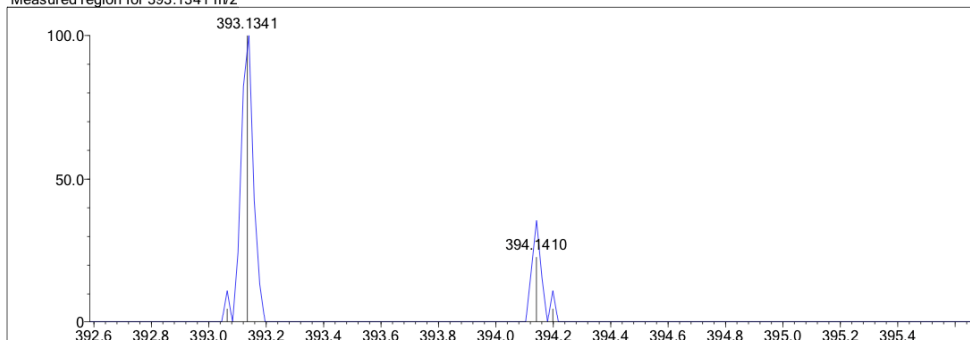

C23 H22 O6 [M-H]- : Predicted region for 393.1344 m/z

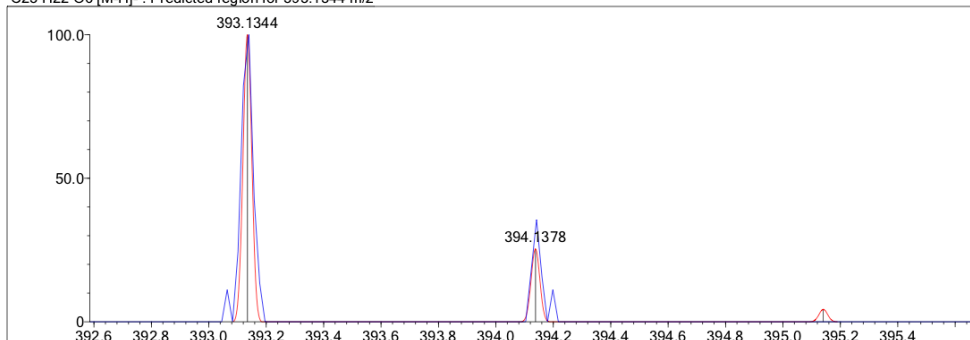

| Formula (M) | Ion    | Meas. m/z | Pred. m/z | Df. (mDa) | Df. (ppm) | DBE  |
|-------------|--------|-----------|-----------|-----------|-----------|------|
| C23 H22 O6  | [M-H]- | 393.1341  | 393.1344  | -0.3      | -0.76     | 13.0 |

Figure S15. HR-ESI-MS spectrum of hypxanthone B.

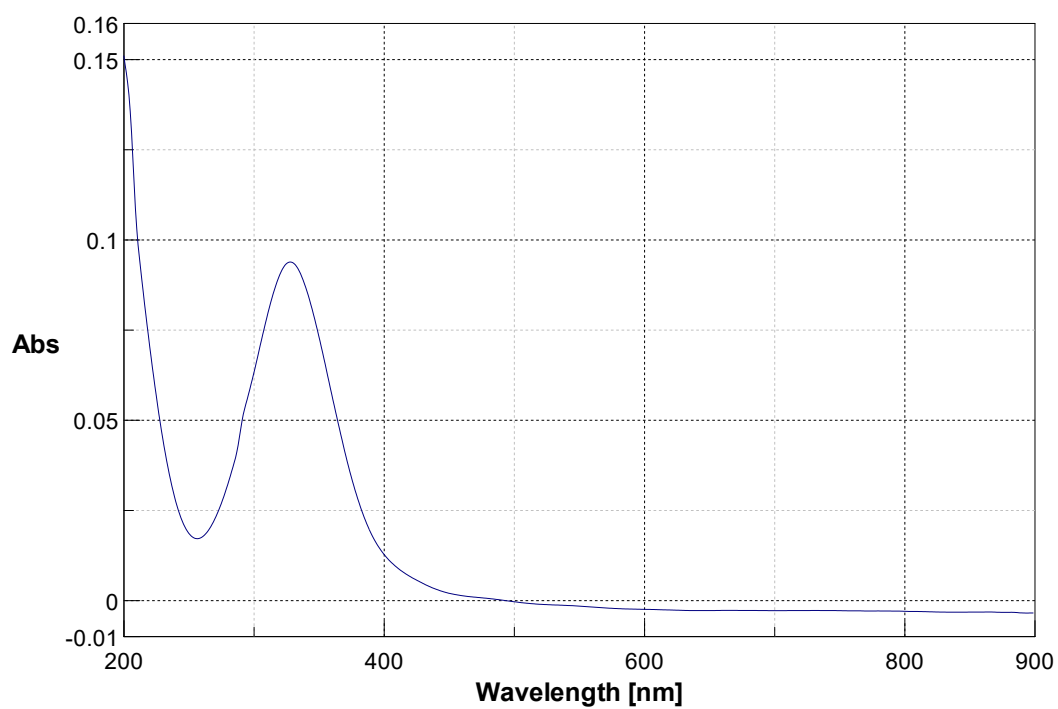

**Figure S16.** The UV spectrum of hypxanthone B.
